# Supplementary material for: Atmospheric circulation patterns, cloud-to-ground lightning, and locally intense convective rainfall associated with debris flow initiation in the Dolomite Alps of northeastern Italy
Source: Copernicus journal article supplement (doi:10.5194/nhess-16-509-2016), 2016-02-22
Supplement: Supplementary file 1 [file nhess-16-509-2016-supplement.pdf]

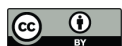

*Supplement of*

**Atmospheric circulation patterns, cloud-to-ground lightning, and locally intense convective rainfall associated with debris flow initiation in the Dolomite Alps of northeastern Italy**

**S. Jeffrey Underwood et al.**

*Correspondence to:* S. Jeffrey Underwood ([sjunderwood@georgiasouthern.edu](mailto:sjunderwood@georgiasouthern.edu))

The copyright of individual parts of the supplement might differ from the CC-BY 3.0 licence.

## Supplement S1

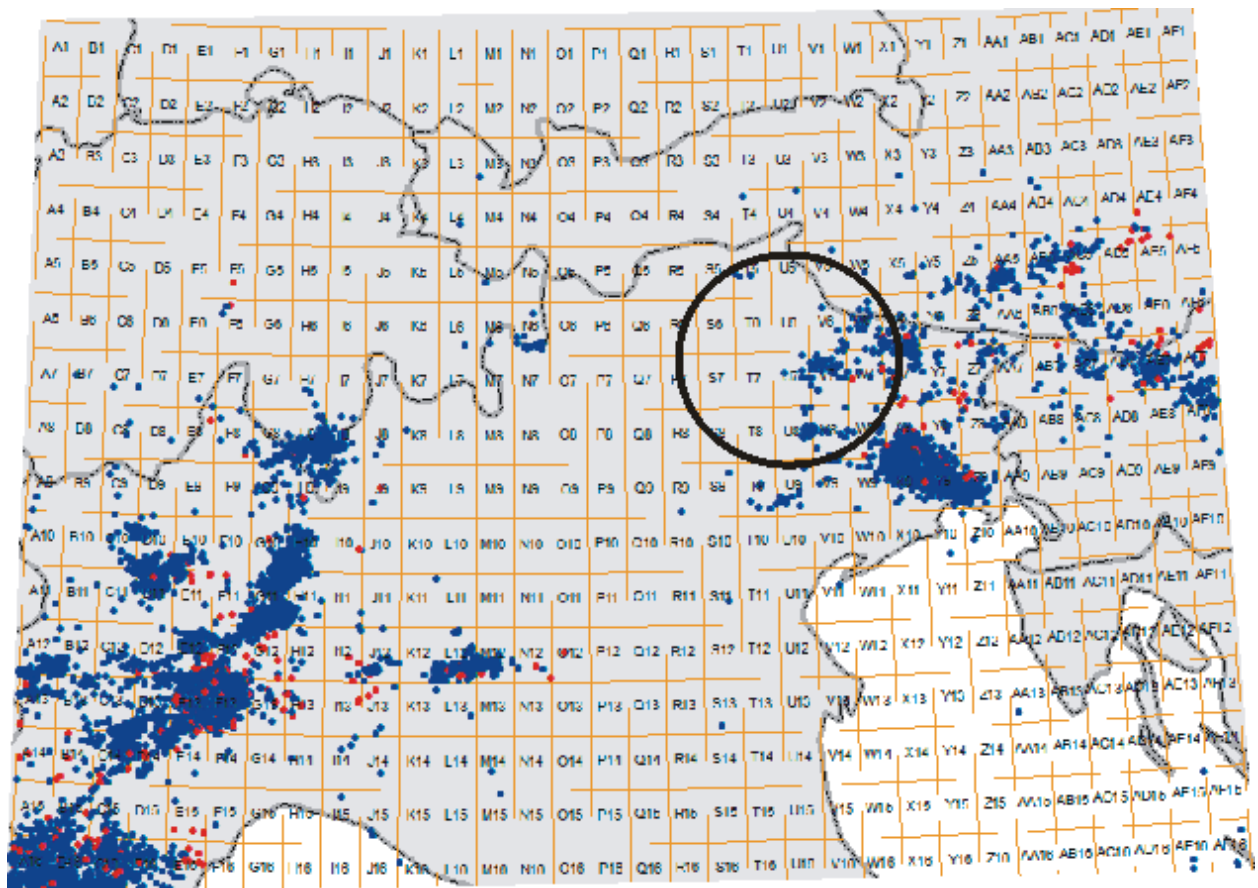

Event-day CG flashes for 7 August 1996 (blue markers = negative flash; red markers = positive flash)

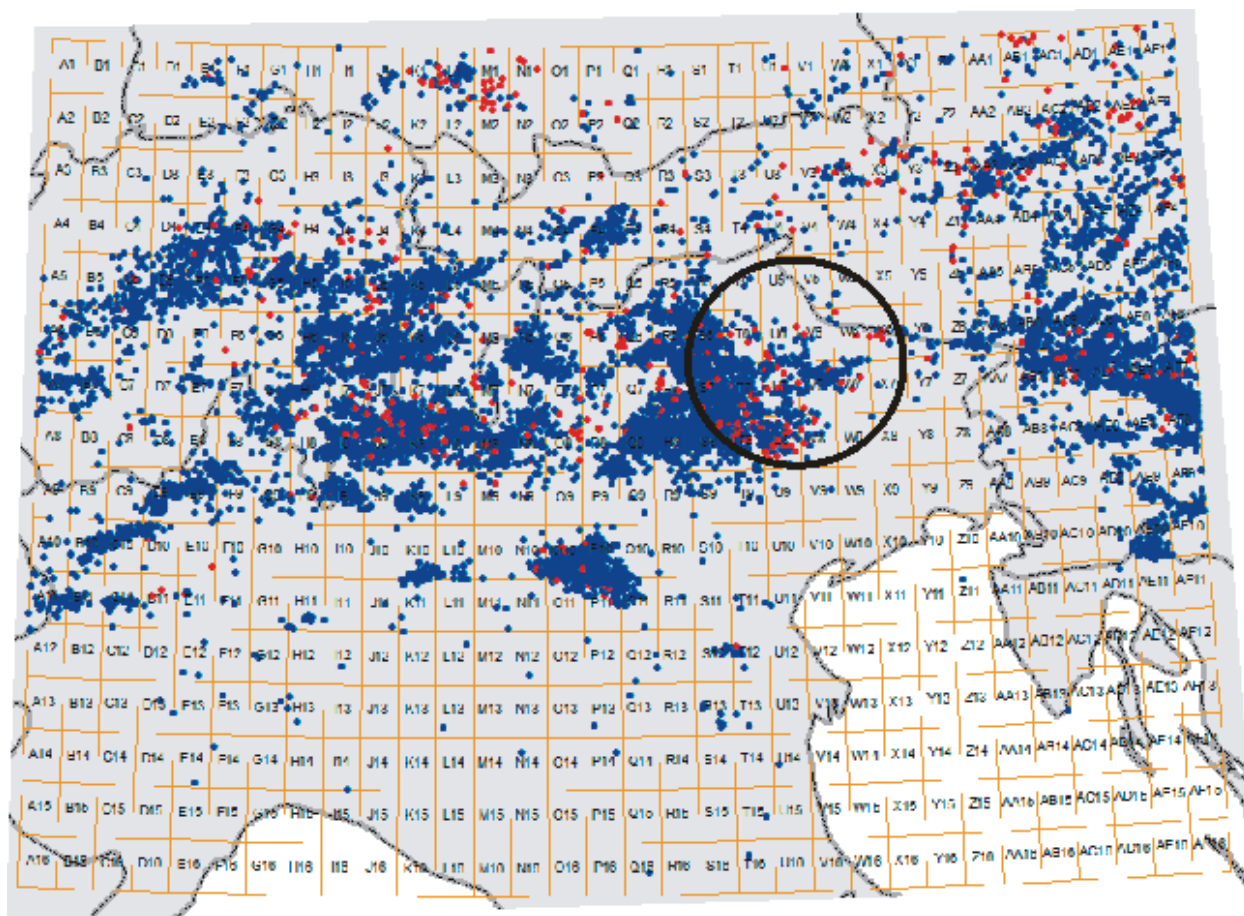

Event-day CG flashes for 12 June 1997 (blue markers = negative flash; red markers = positive flash)

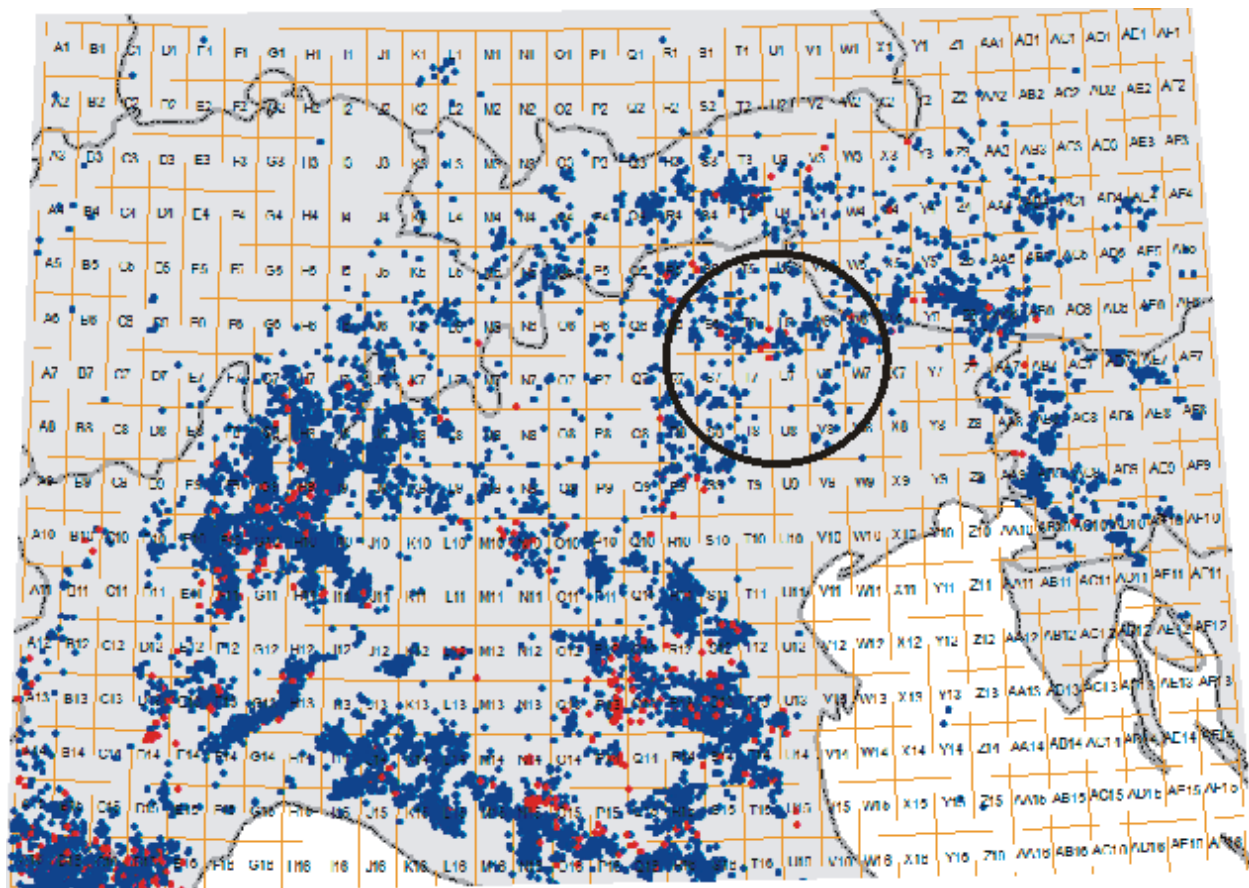

Event-day CG flashes for 17 August 1998 (blue markers = negative flash; red markers = positive flash)

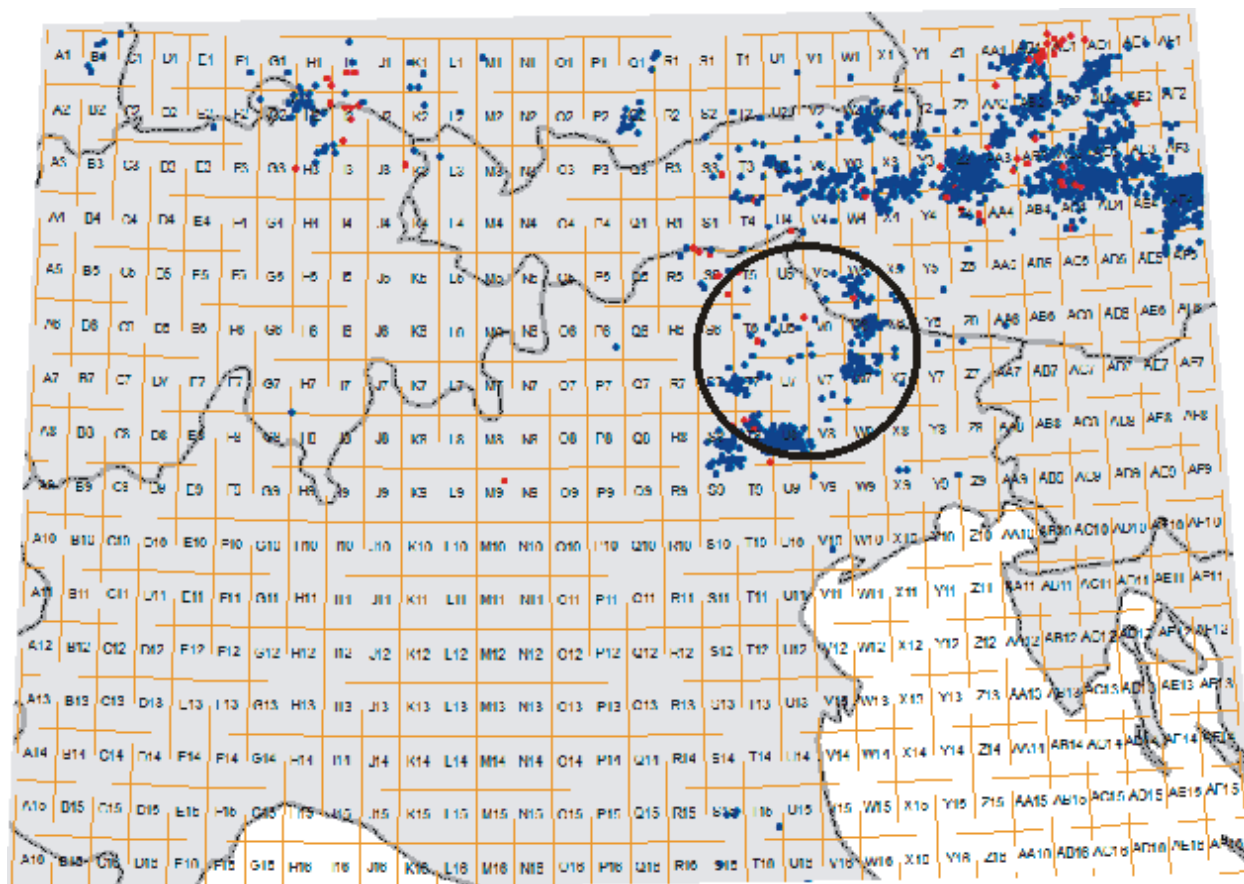

Event-day CG flashes for 20 August 1999 (blue markers = negative flash; red markers = positive flash)



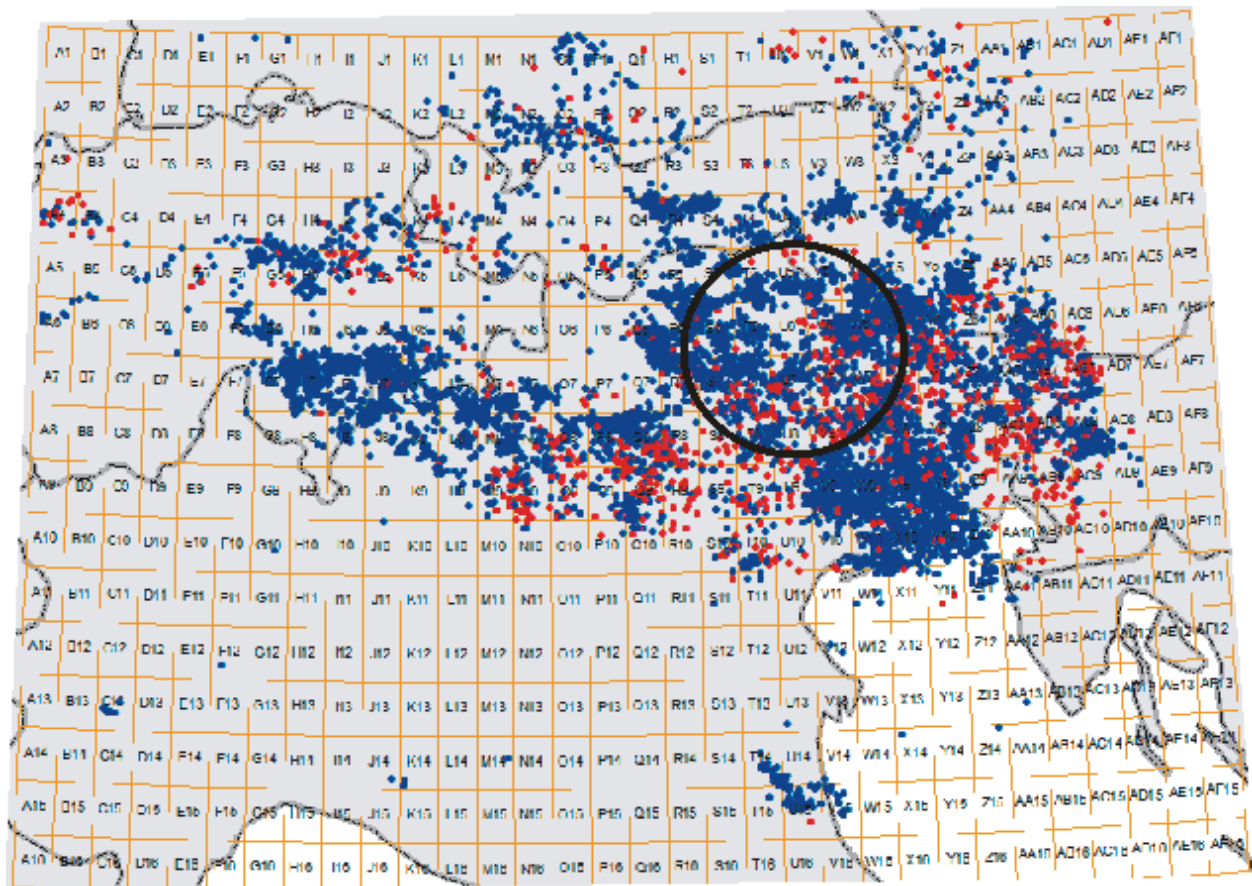

Event-day CG flashes for 30 June 2001 (blue markers = negative flash; red markers = positive flash)

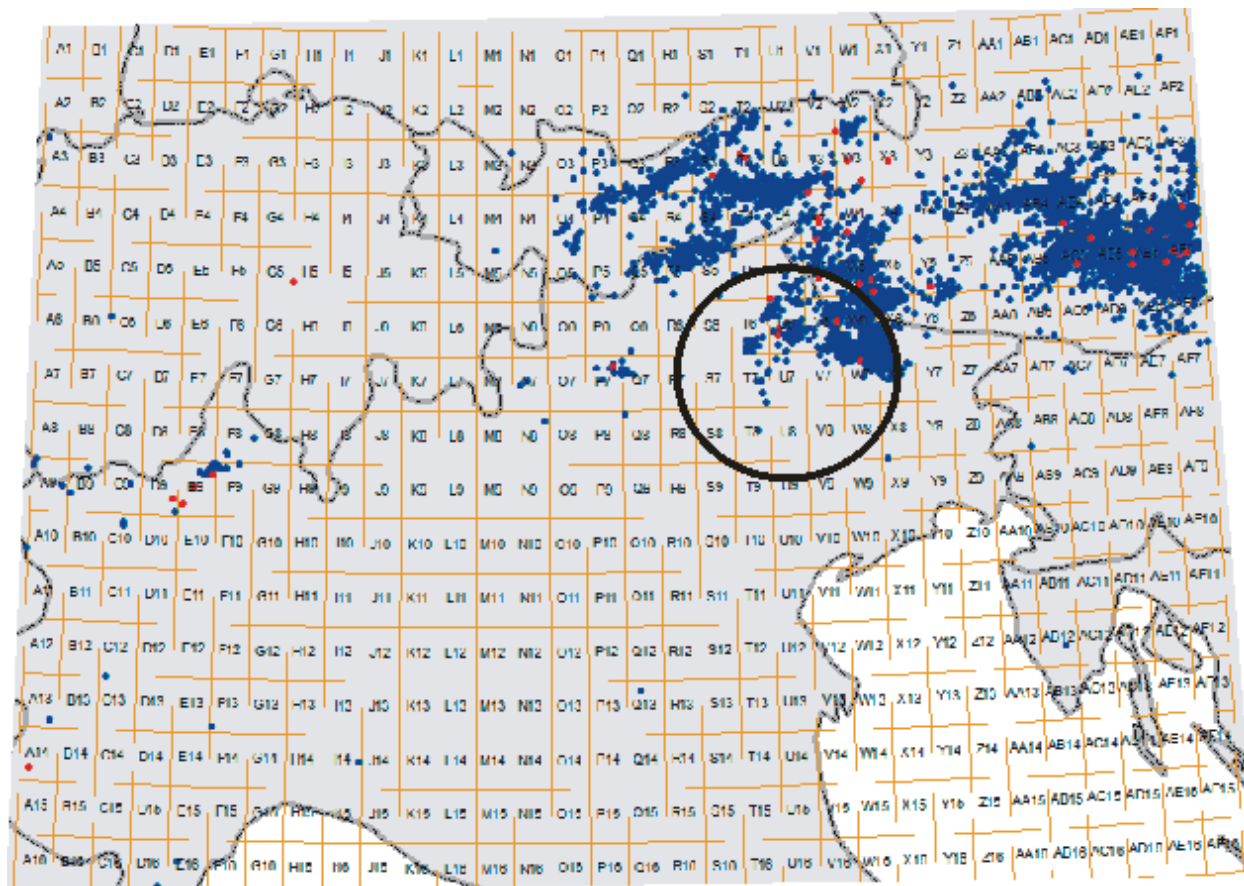

Event-day CG flashes for 19 July 2004 (blue markers = negative flash; red markers = positive flash)

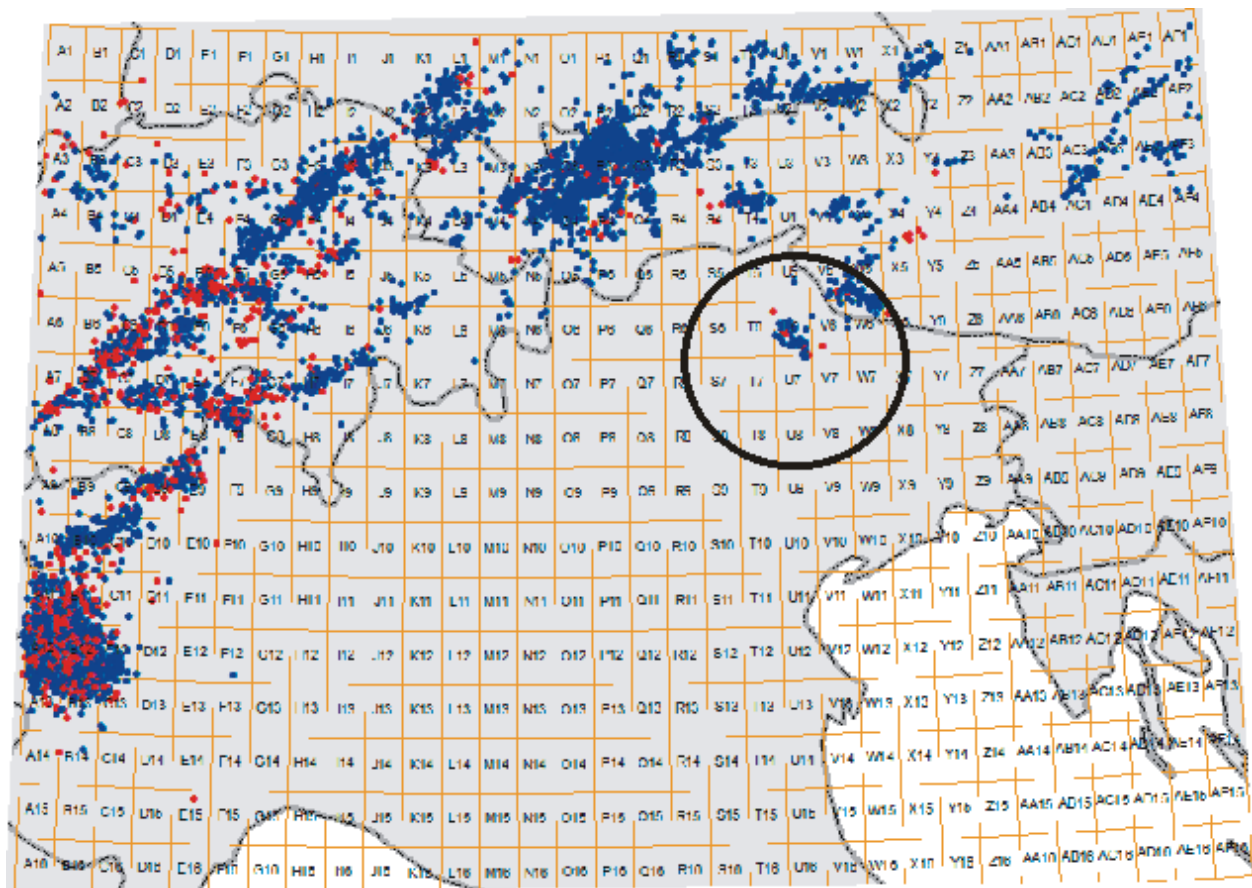

Event-day CG flashes for 18 August 2011 (blue markers = negative flash; red markers = positive flash)



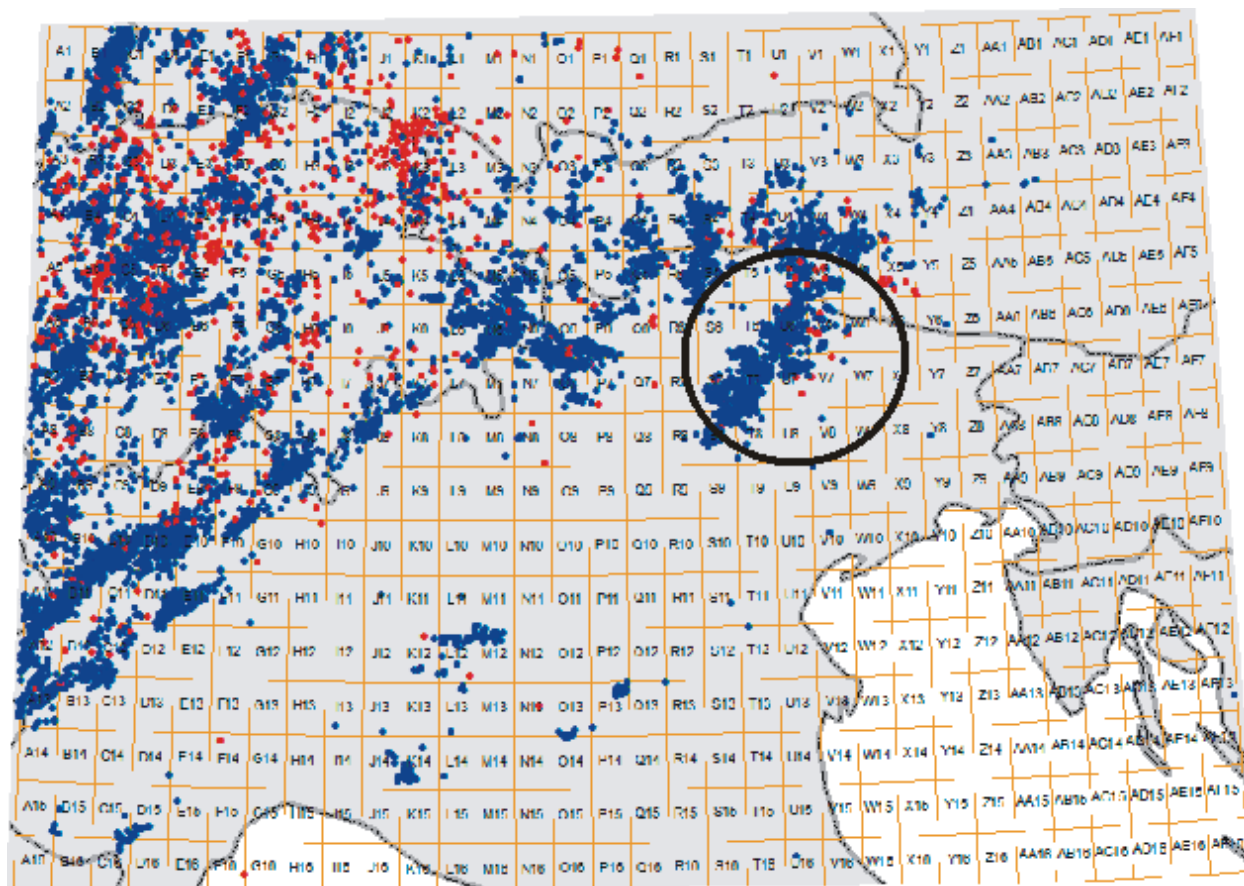

Event-day CG flashes for 5 July 2006 (blue markers = negative flash; red markers = positive flash)

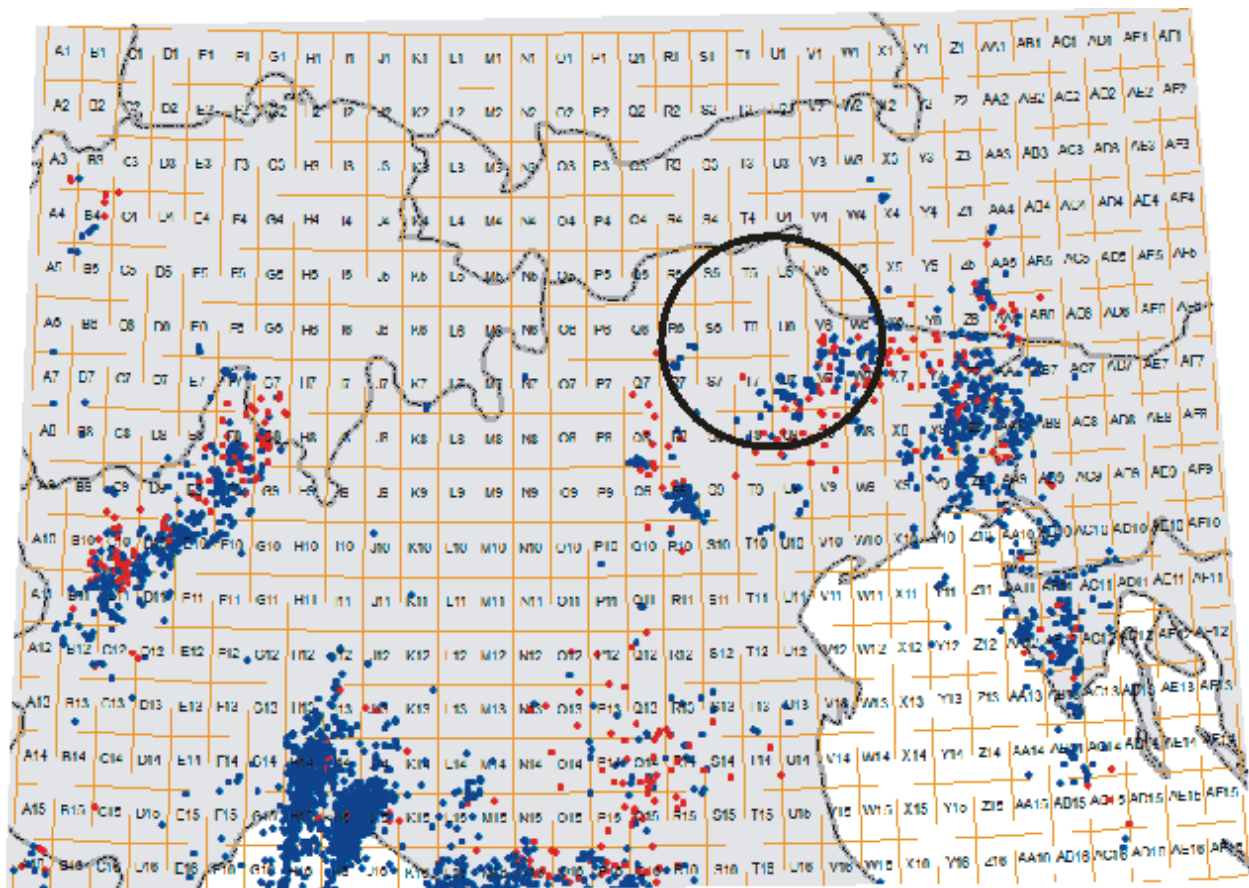

Event-day CG flashes for 20 September 1999 (blue markers = negative flash; red markers = positive flash)

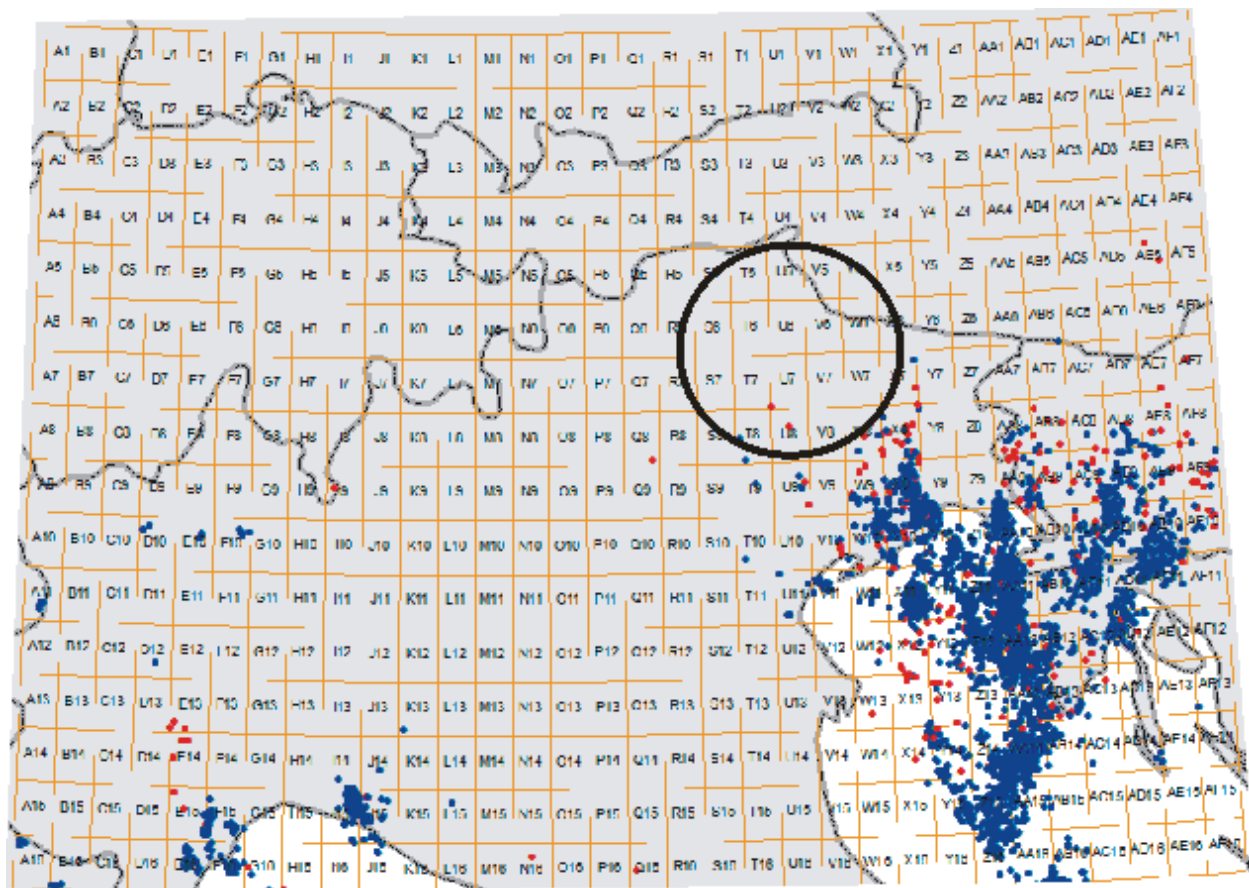

Event-day CG flashes for 30 September 2000 (blue markers = negative flash; red markers = positive flash)

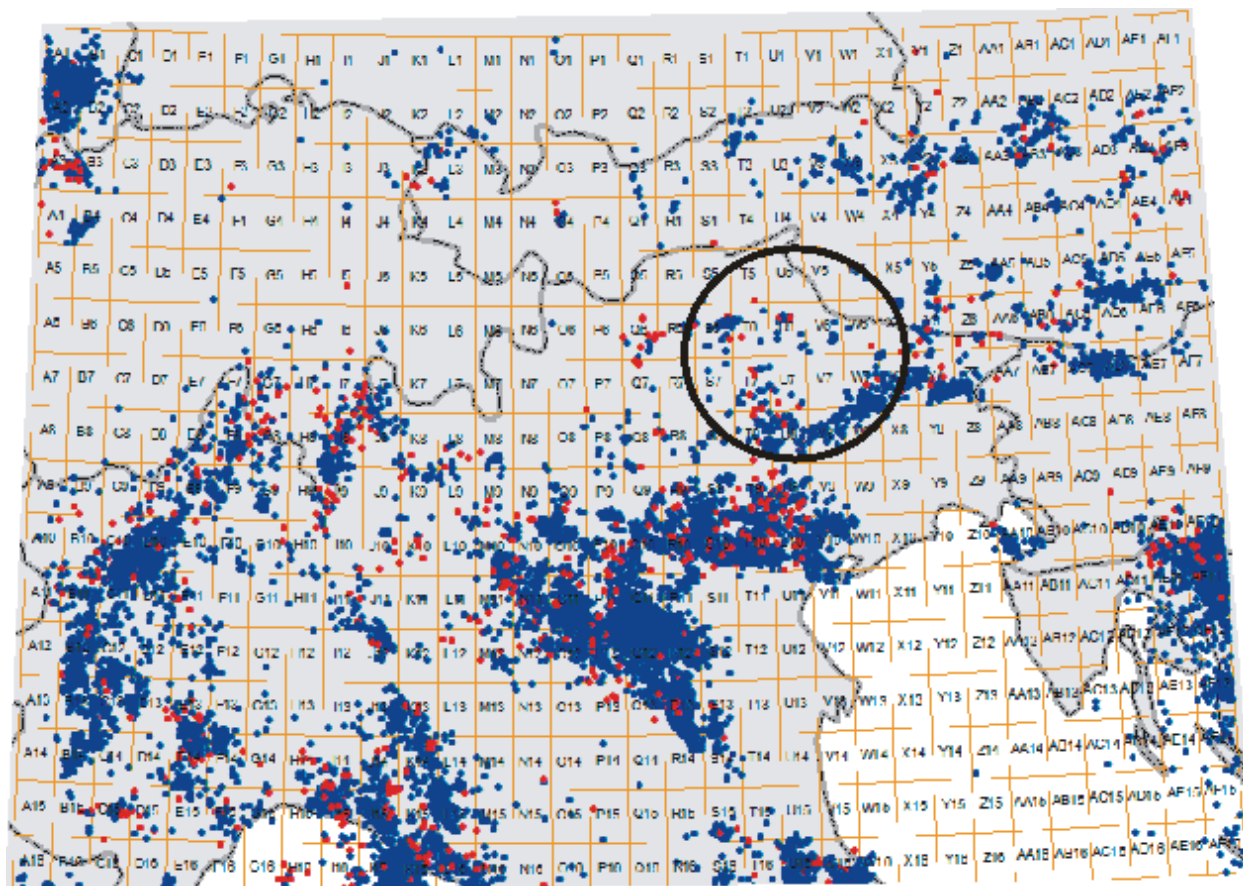

Event-day CG flashes for 28 July 1999 (blue markers = negative flash; red markers = positive flash)

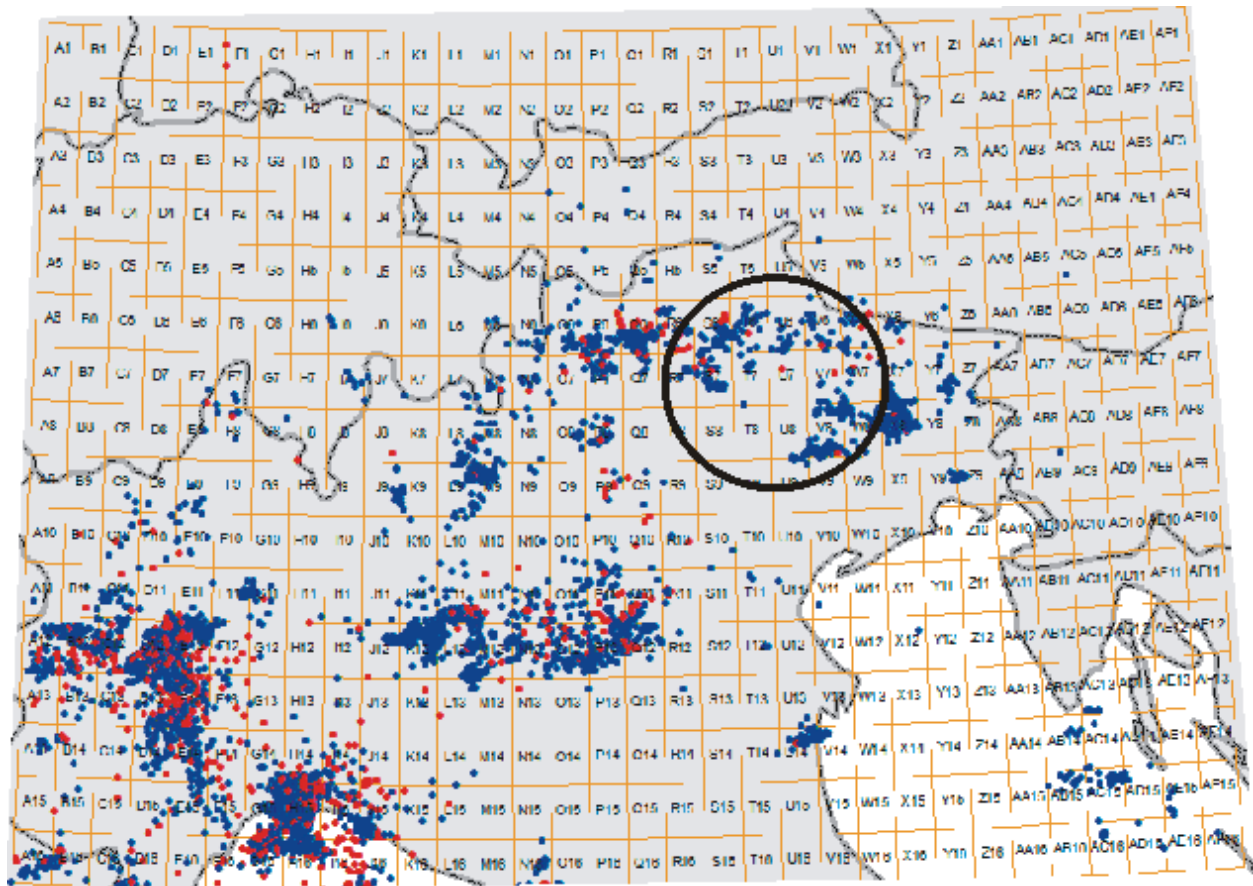

Event-day CG flashes for 4 July 2011 (blue markers = negative flash; red markers = positive flash)



## Supplement S2

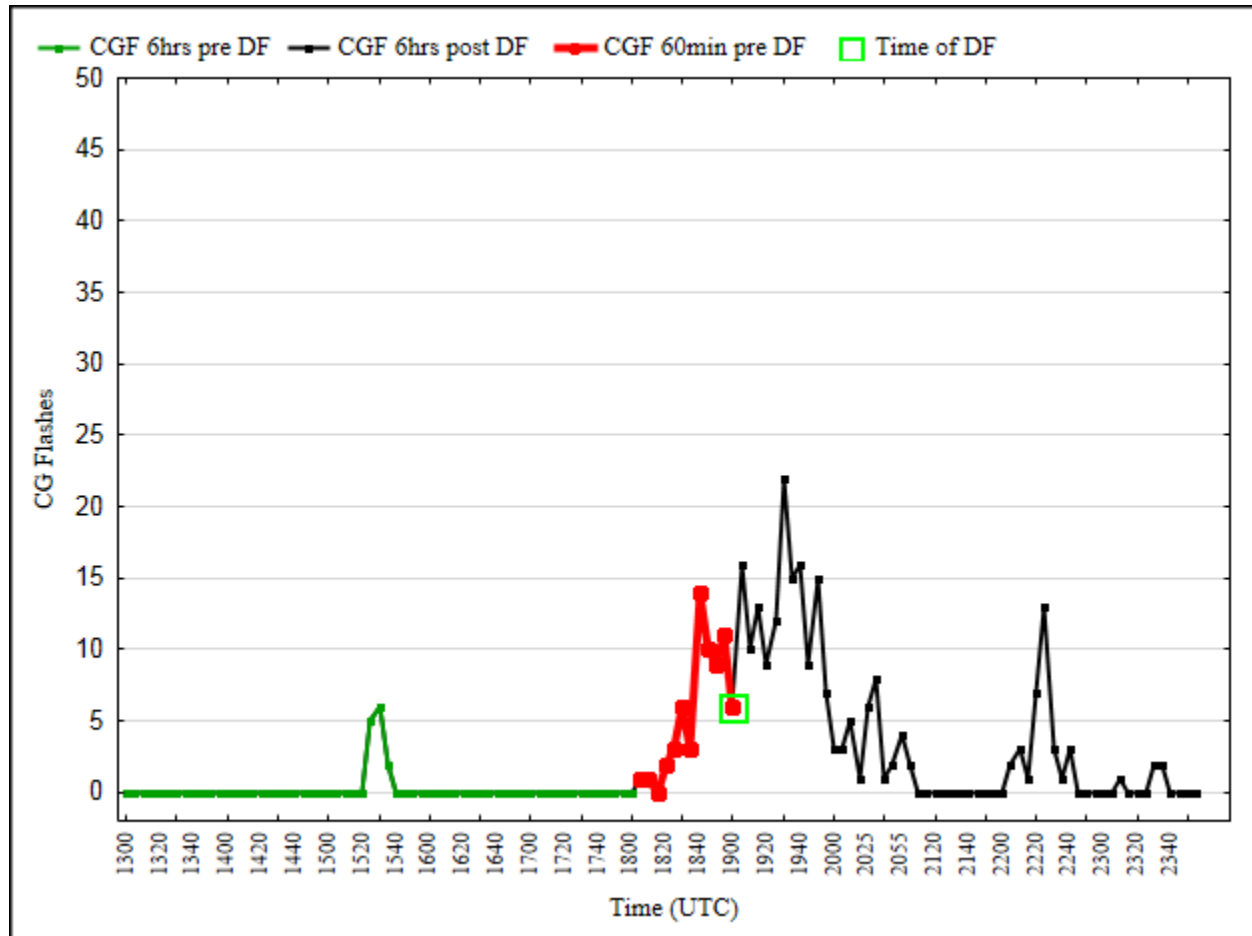

Meso- $\beta$  CG flash plot for 7 August 1996

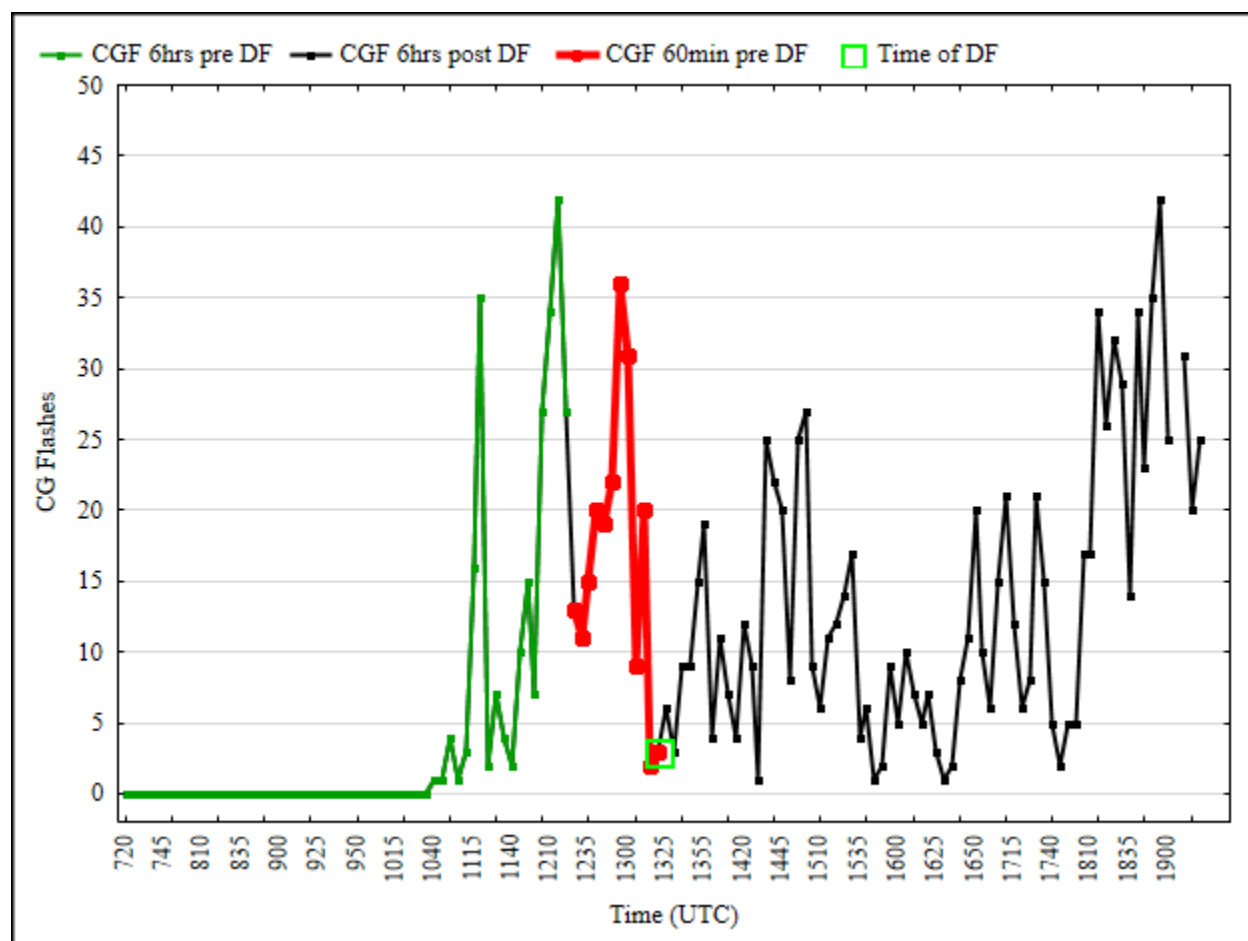

Meso- $\beta$  CG flash plot for 12 June 1997

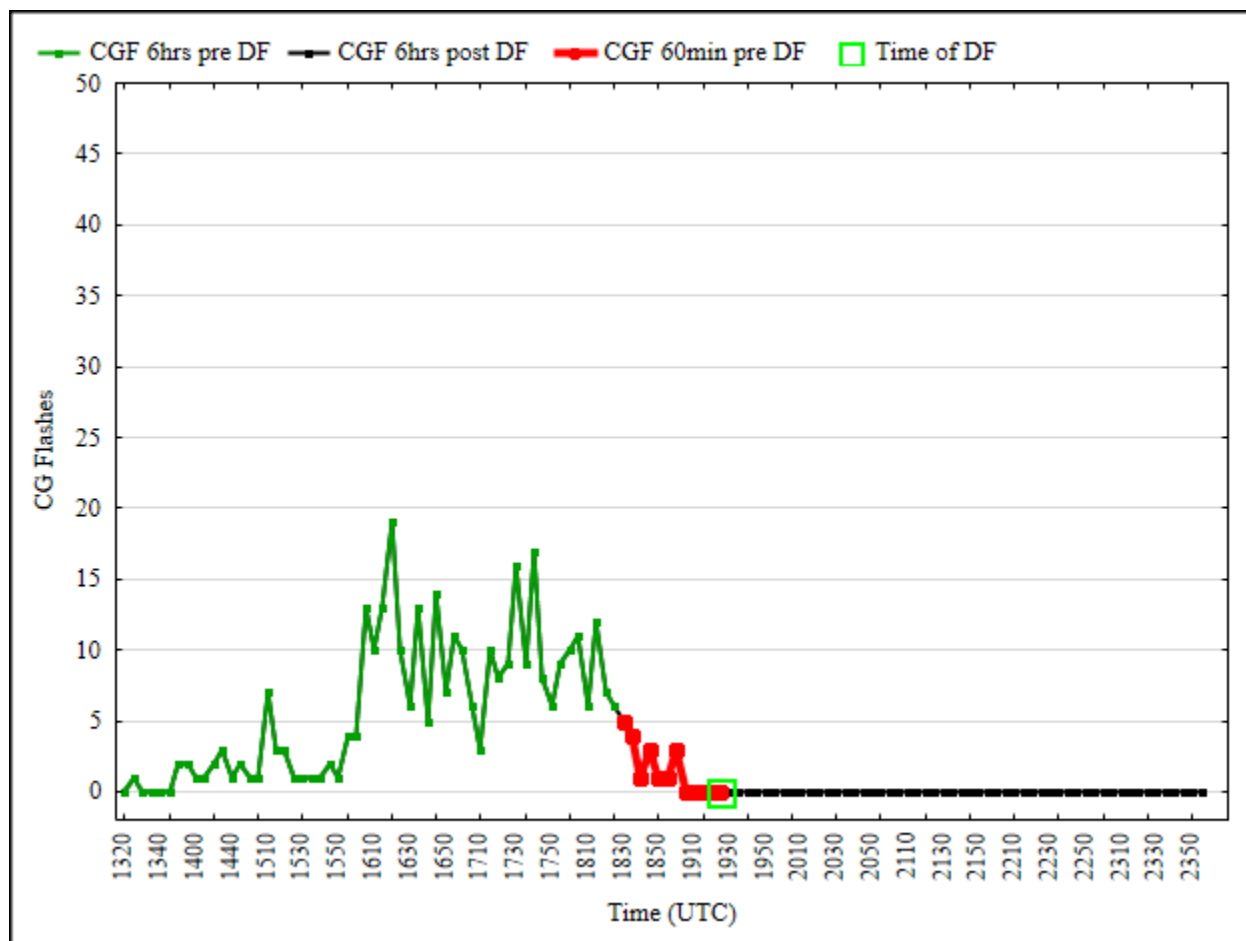

Meso- $\beta$  CG flash plot for 17 August 1998

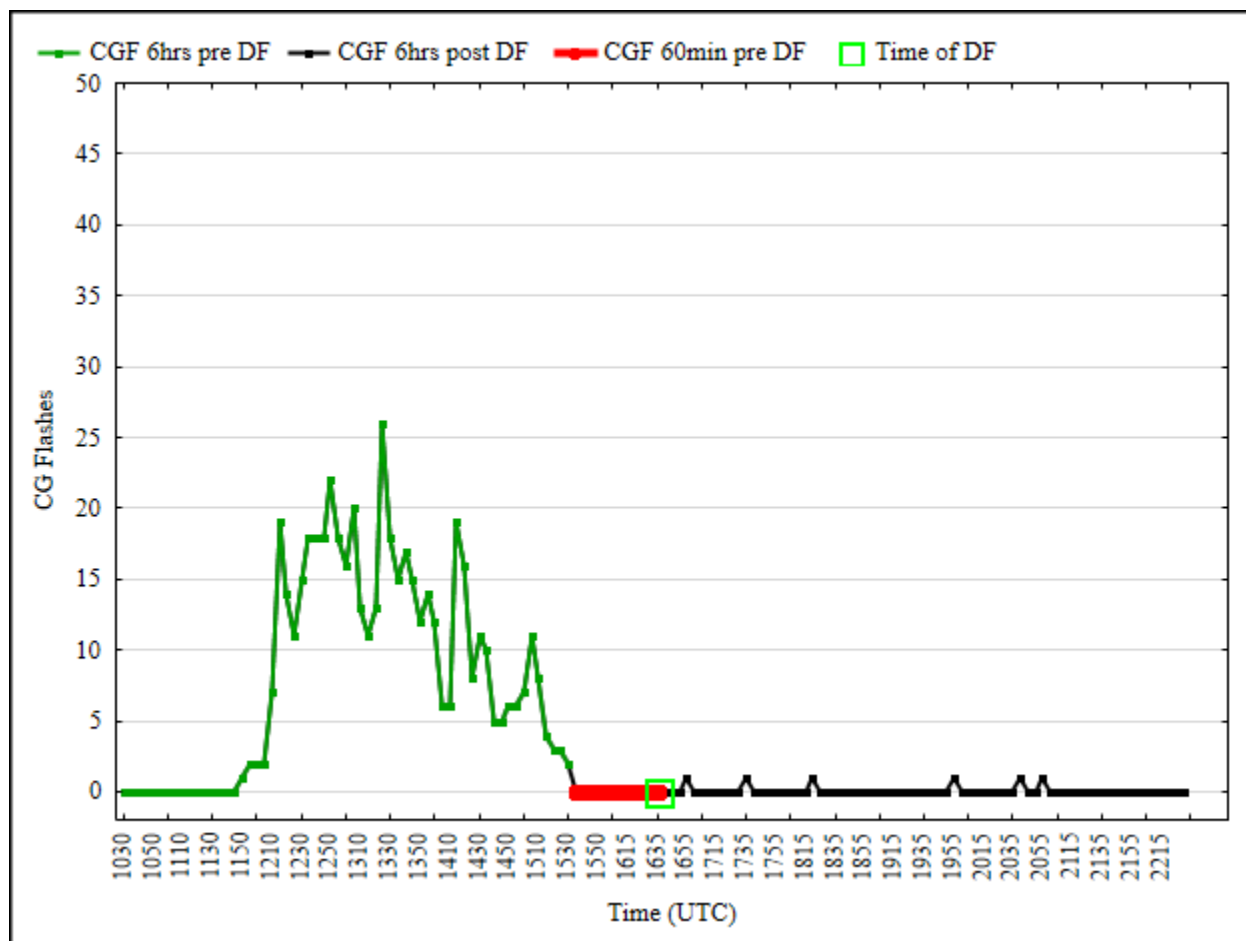

Meso- $\beta$  CG flash plot for 20 July 1999

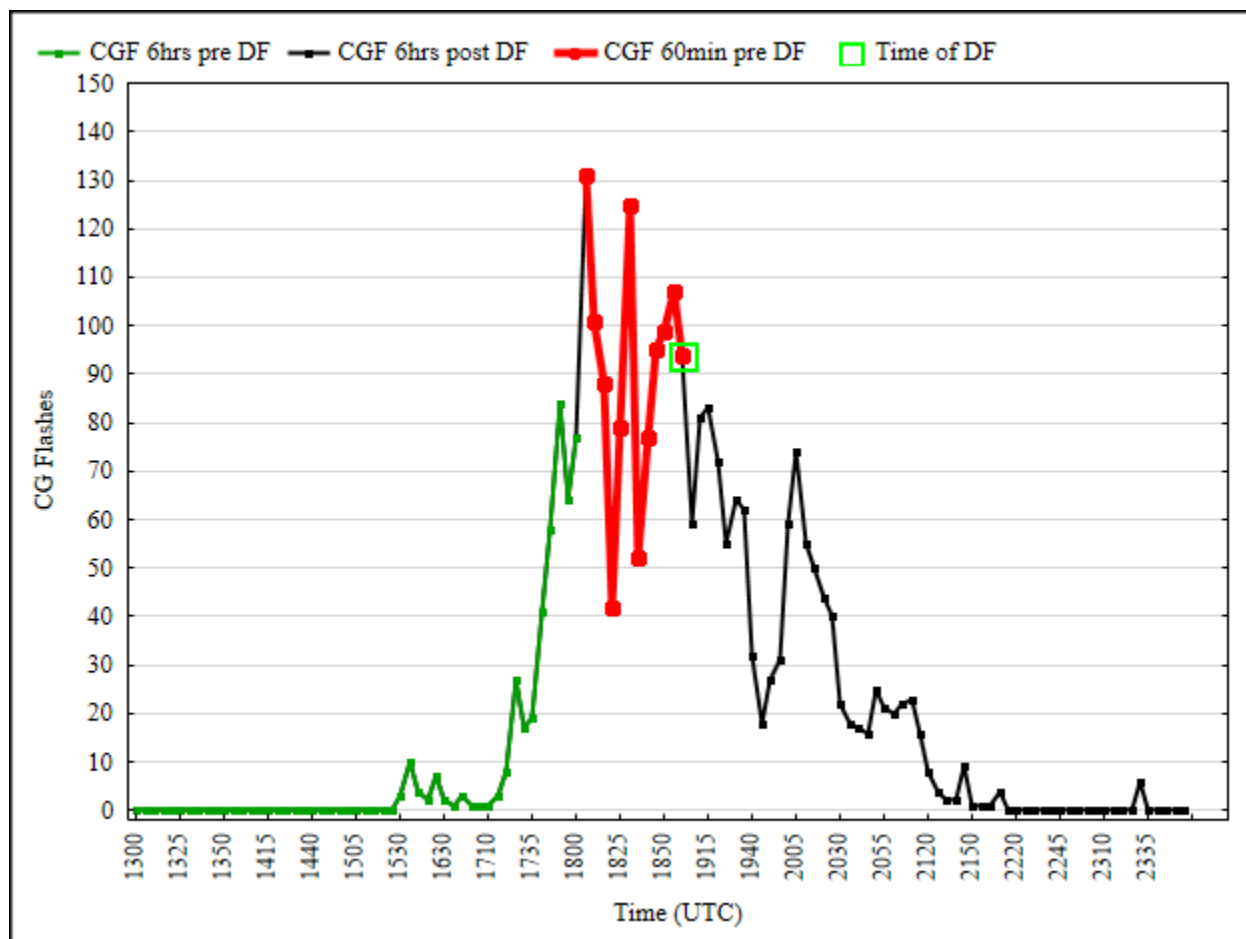

Meso- $\beta$  CG flash plot for 30 June 2001



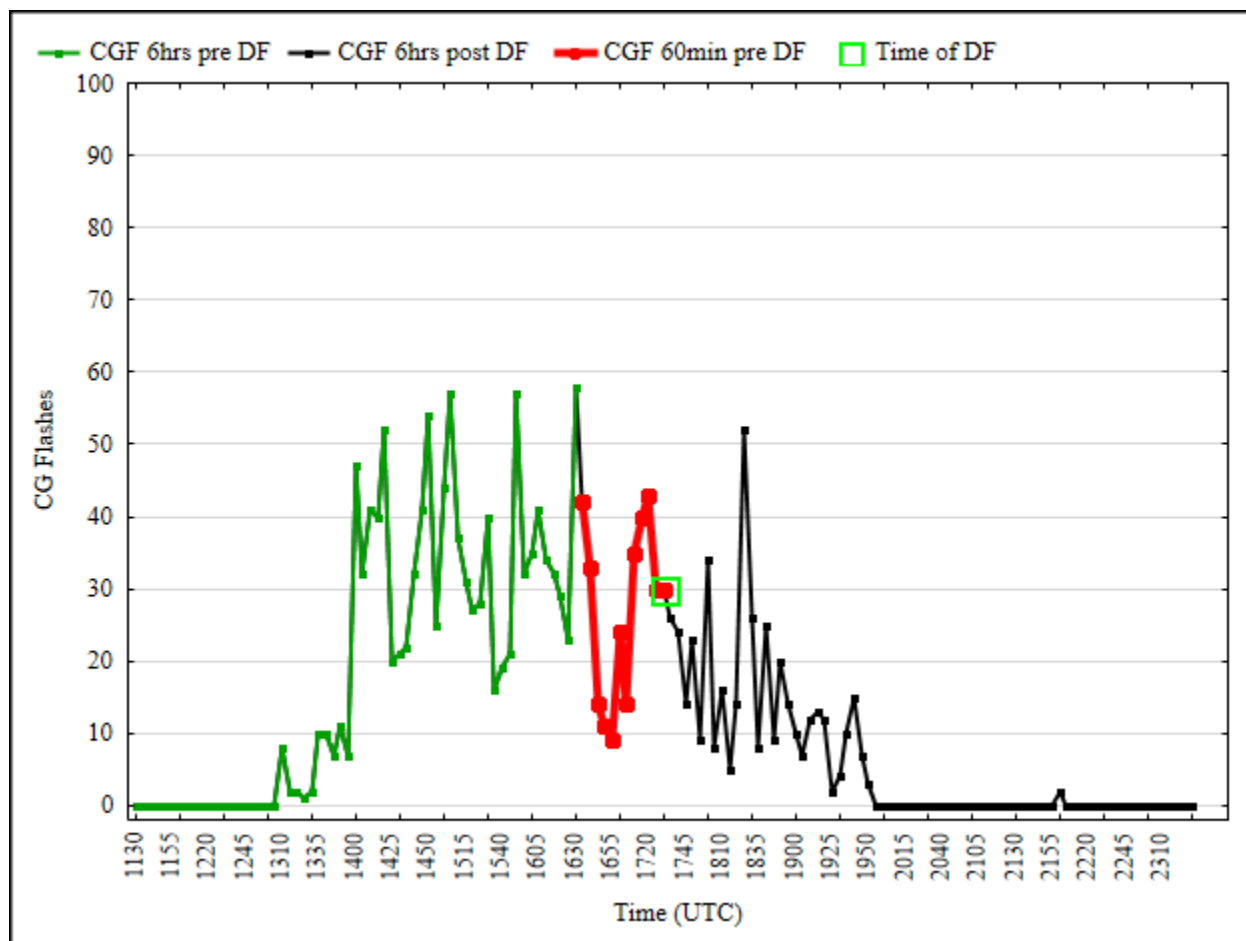

Meso- $\beta$  CG flash plot for 19 July 2004

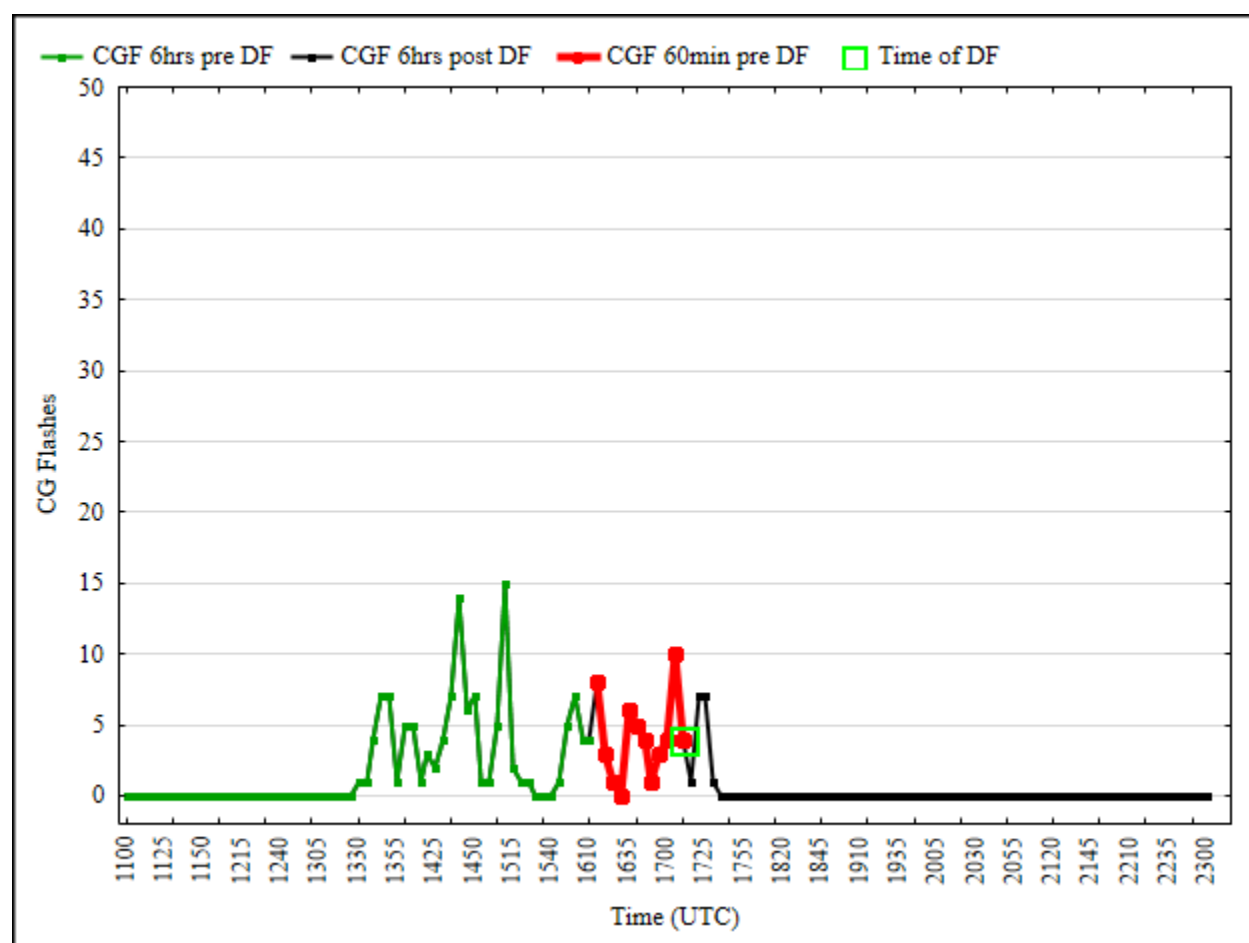

Meso- $\beta$  CG flash plot for 18 August 2011

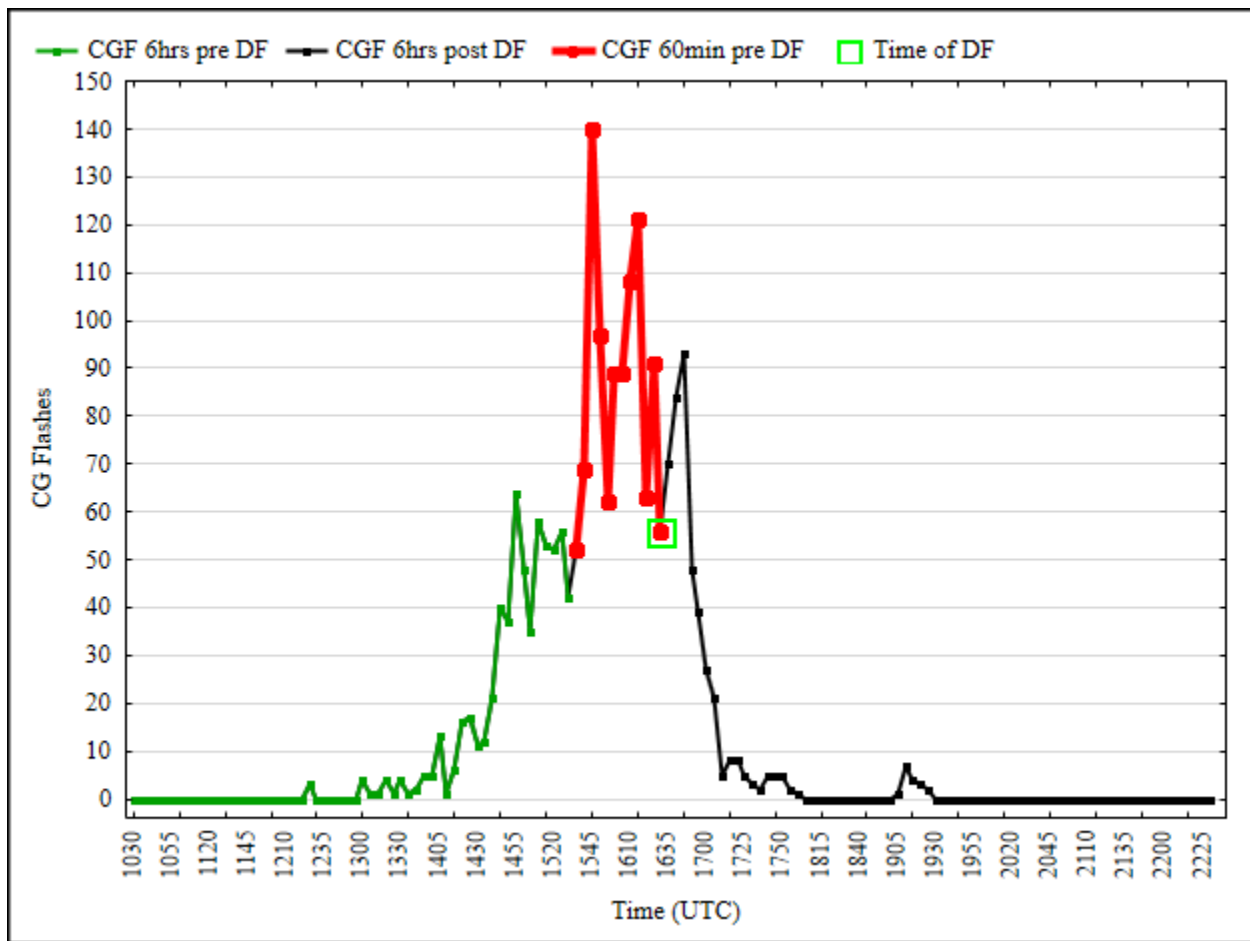

Meso-β CG flash plot for 5 July 2006

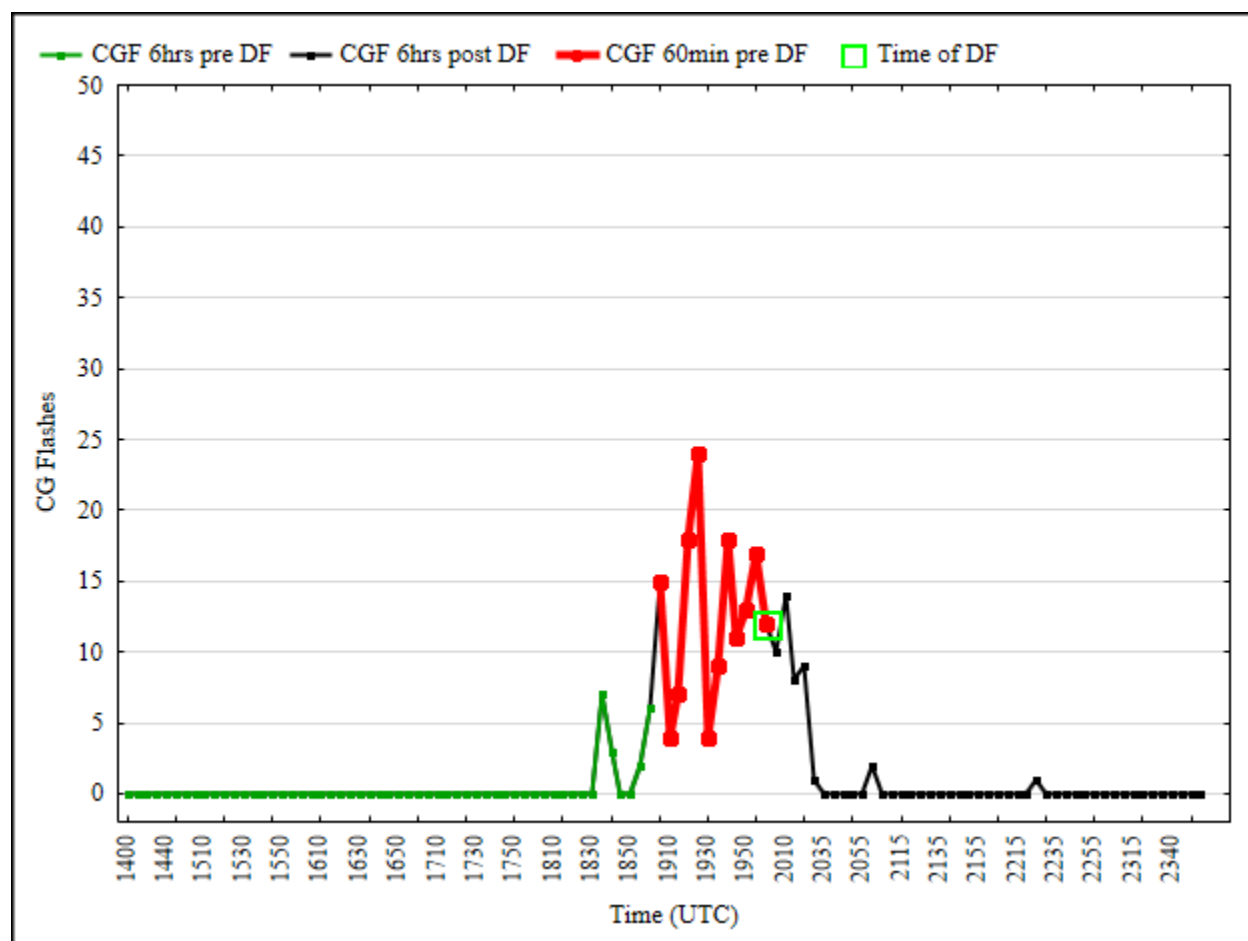

Meso- $\beta$  CG flash plot for 20 September 1999

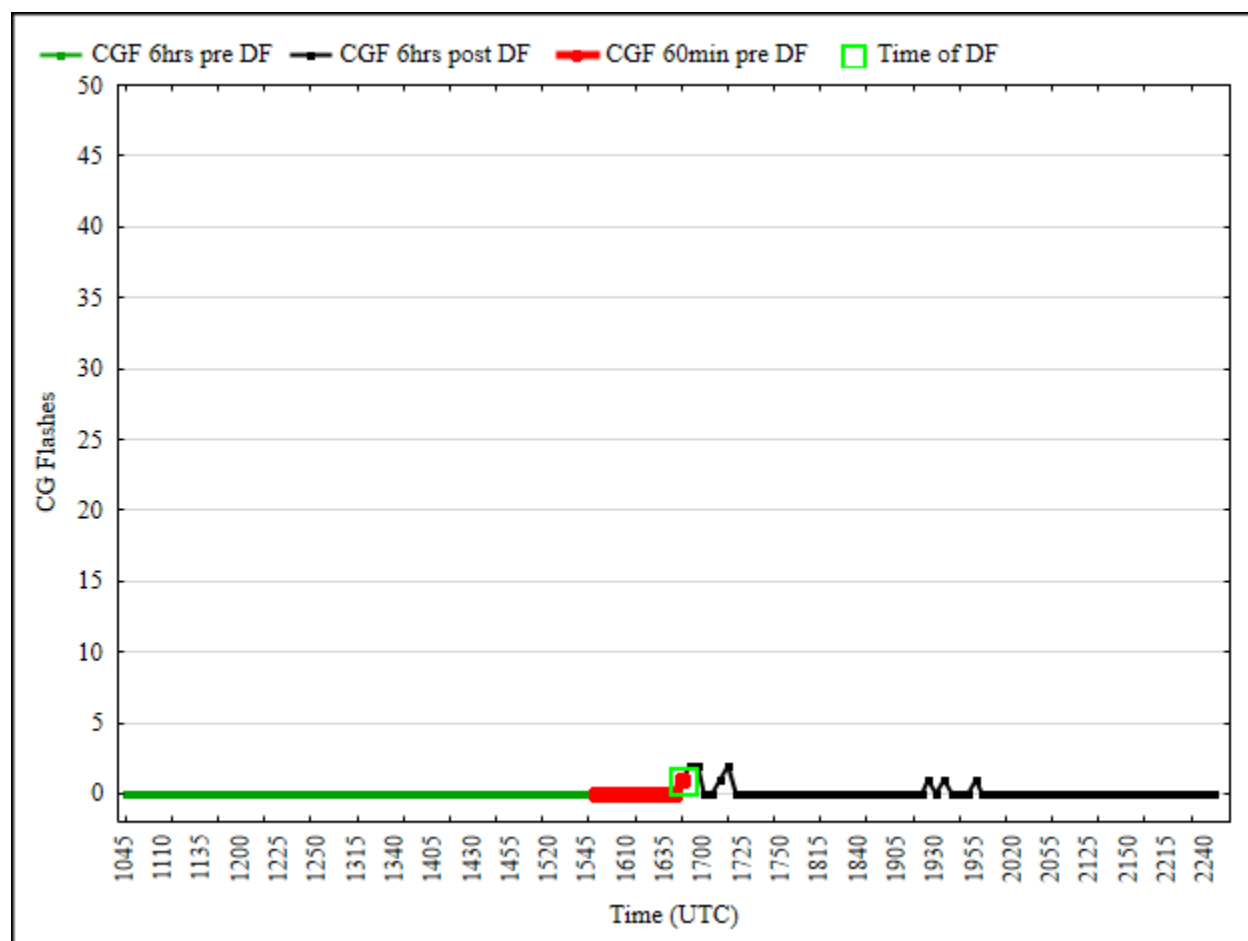

Meso- $\beta$  CG flash plot for 30 September 2000



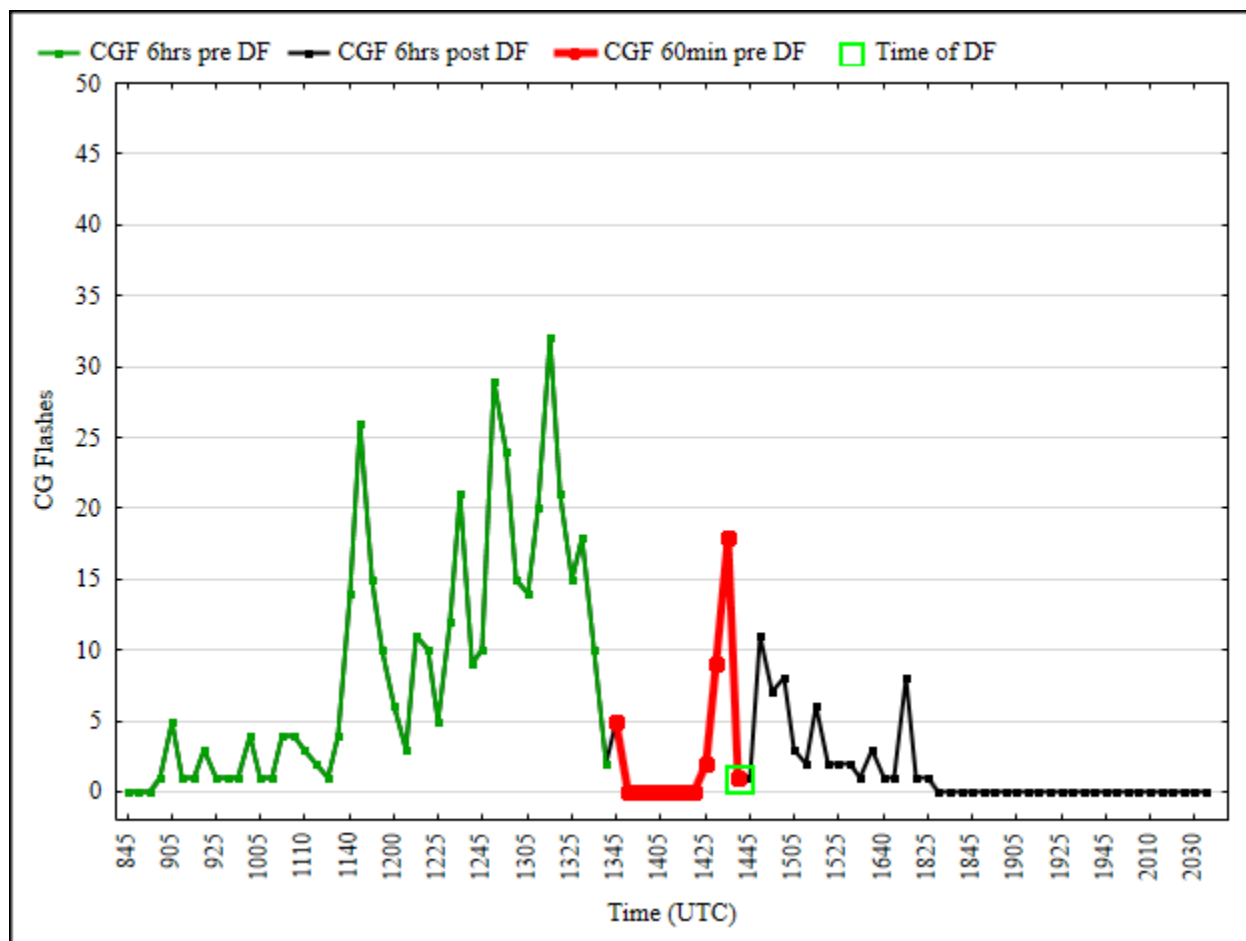

Meso- $\beta$  CG flash plot for 28 July 1999

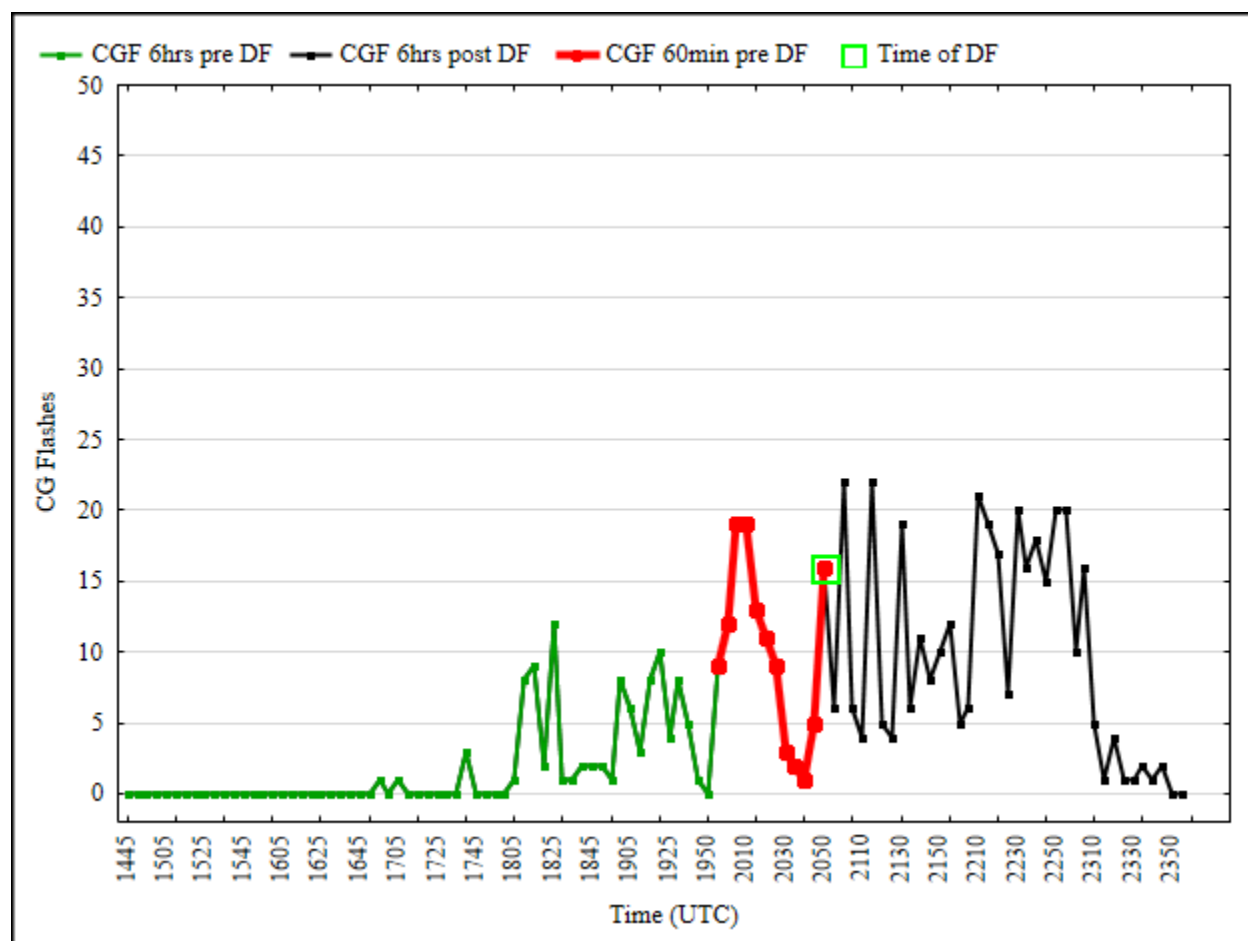

Meso- $\beta$  CG flash plot for 4 July 2011
